# Supplementary material
Source: PubMed Central journal article supplement (PMC8260051)
Supplement: mjab014_supplementary_data.pdf [file mjab014_supplementary_data.pdf]

## **Supplementary Materials and methods**

### **Lymphocyte response evaluation by flow cytometry**

PBMCs were separated from the cell pellets after resuspension in PBS by density gradient centrifugation and then resuspended in complete RPMI 1640 medium containing 10% FBS (Gibco), 1% penicillin and 1% streptomycin. PBMCs were then divided for testing with 5 panels for analysis: panel 1 for T cell differentiation, proliferation and activation detection, panel 2 for Treg detection, panel 3 for B cell detection, panel 4 for circulating T follicular helper (cTfh) detection, and panel 5 for cell cytokine production detection. The PBMCs for panel 1 to panel 4 were directly used for staining, while the PBMCs for panel 5 were stimulated with 200 ng/ml PMA (Beyotime, China) and 2.5  $\mu$ M ionomycin (Beyotime, China) in the presence of 1  $\mu$ M monensin (BioLegend, USA) and 2.5  $\mu$ g/ml brefeldin A at 37  $^{\circ}$ C in 5% CO<sub>2</sub> for 4.5 h before staining. PBMCs were stained with dead cell discrimination markers (eBioscience™ Fixable Viability Dye eFluor™ 506, FVD) and surface-staining antibodies in PBS at 4  $^{\circ}$ C for 30 min. After washing with PBS, the cells were fixed with fixation/permeabilization buffer (eBioscience) at 4  $^{\circ}$ C overnight and then stained with the respective panel of intracellular markers in permeabilization buffer at 4  $^{\circ}$ C for 30 min. The antibodies used are listed in supplementary Table S2. A BD LSR Fortessa flow cytometer (Becton Dickinson) was used to assess the stained cells, and data were analyzed using FlowJo V7.0.

### **Measurement of total IgM and IgG in plasma**

Total IgM and IgG in plasma were determined by ELISA as described in supplementary materials and methods. Briefly, each well of flat-bottom 96-well ELISA plates (Greiner Bio-one) were coated with 100  $\mu$ l of 3  $\mu$ g/ml unlabeled goat anti-human IgM or IgG polyclonal antibodies (Southern Biotechnology) and incubated at 4  $^{\circ}$ C overnight. Plates were blocked with 1% bovine serum albumin in PBS for 2 h, and 100  $\mu$ l of serially diluted plasma was subsequently applied in blocking buffer. Alkaline phosphatase-labeled goat anti-human IgM or IgG polyclonal antibodies (Southern Biotechnology) and p-nitrophenyl phosphate substrate (Sigma) were used for detection. The absorbance was read by a microplate reader (Thermo Labsystems) at 405 nm.

## Supplementary figures

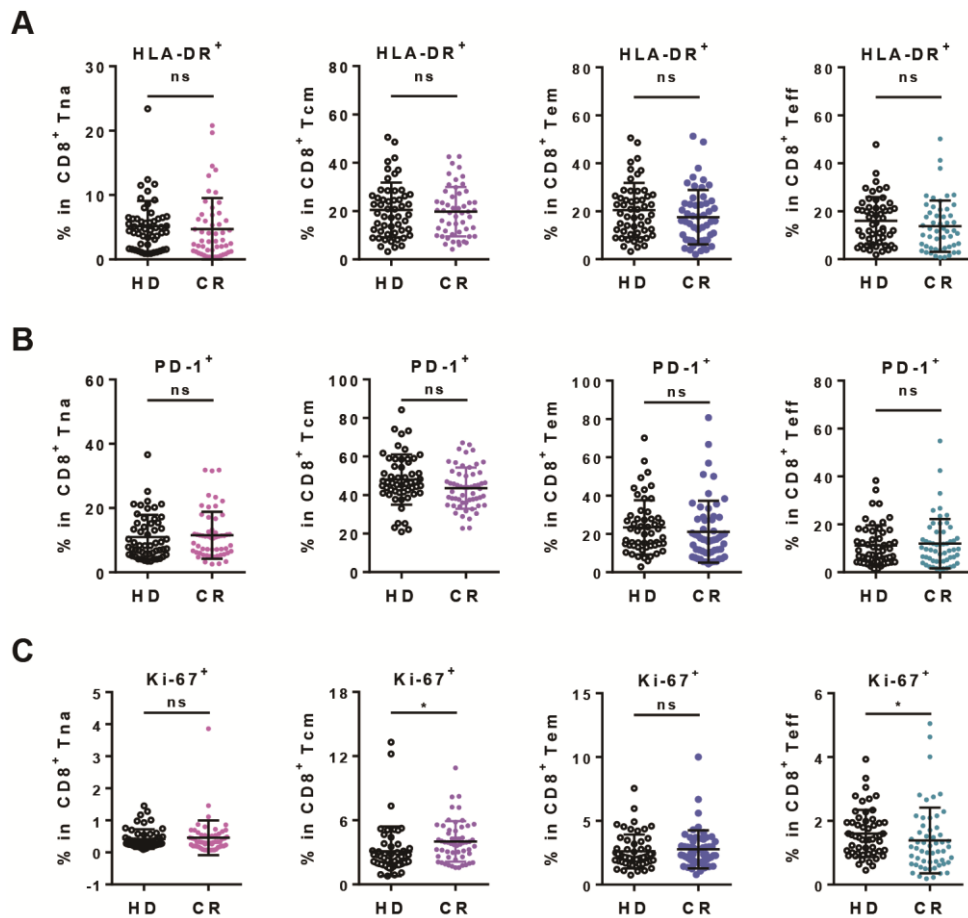

**Supplementary Figure S1 Activation and proliferation of the Tna, Tcm, Tem and Teff subsets of CD8<sup>+</sup> T cells.** Frequencies of HLA-DR<sup>+</sup> (A), PD-1<sup>+</sup> (B) and Ki-67<sup>+</sup> (C) in naïve T cells (Tna), central memory T cells (Tcm), effector memory T cell (Tem) and effector T cell (Teff) subsets of CD8<sup>+</sup> T cells in PBMCs of healthy donors (HD, n=55) and subjects clinically recovered from COVID-19 (CR, n=55). ns, non-significant; \*, P<0.05.

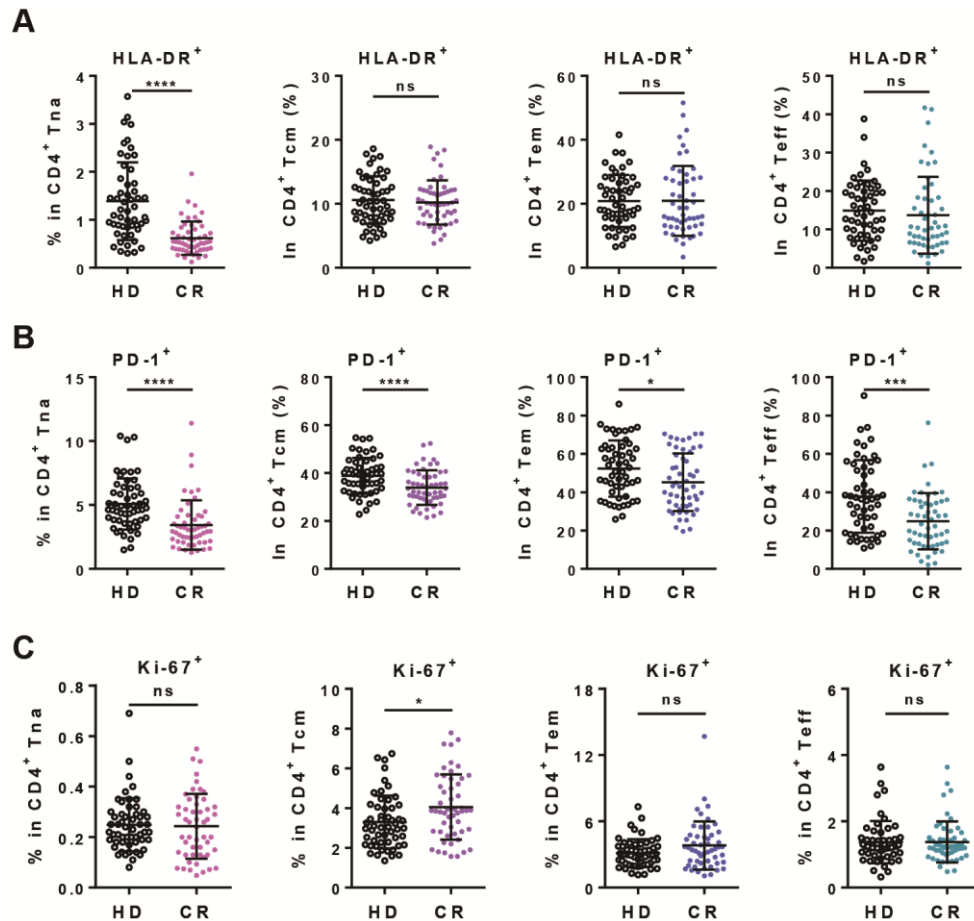

**Supplementary Figure S2 Activation and proliferation of the Tna, Tcm, Tem and Teff subsets of CD4<sup>+</sup> T cells.** Frequencies of HLA-DR<sup>+</sup> (A), PD-1<sup>+</sup> (B) and Ki-67<sup>+</sup> (C) in naïve T cells (Tna), central memory T cells (Tcm), effector memory T cell (Tem) and effector T cell (Teff) subsets of CD4<sup>+</sup> T cells in PBMCs of healthy donors (HD, n=55) and subjects clinically recovered from COVID-19 (CR, n=55). ns, non-significant; \*, P<0.05; \*\*\*, p<0.001; \*\*\*\*, p<0.0001.

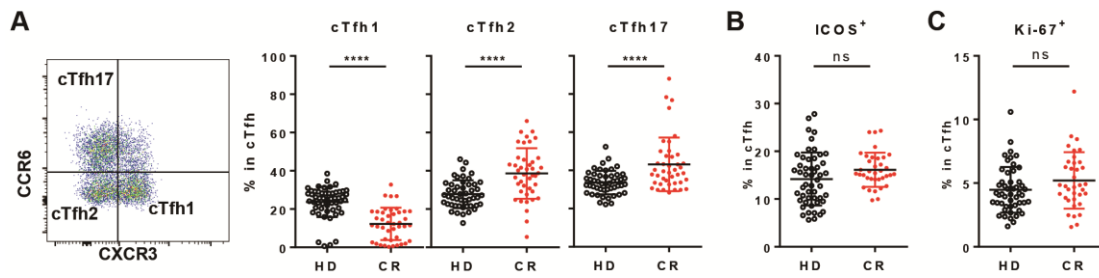

**Supplementary Figure S3. Percentages of cTfh subsets and the activation, proliferation of cTfh in peripheral blood of HD and CR.** A, Gating strategy and the percentages of cTfh subsets cTfh1 (CXCR3<sup>+</sup> CCR6<sup>-</sup>), cTfh2 (CXCR3<sup>-</sup> CCR6<sup>-</sup>) and cTfh17 (CXCR3<sup>-</sup> CCR6<sup>+</sup>) of cTfh in PBMCs of healthy donors (HD, n=55) and subjects clinically recovered from COVID-19 (CR, n=36). B and C, The frequencies of ICOS<sup>+</sup> and Ki-67<sup>+</sup> cells in cTfh. ns, non-significant; \*\*\*, p<0.001; \*\*\*\*, p<0.0001.

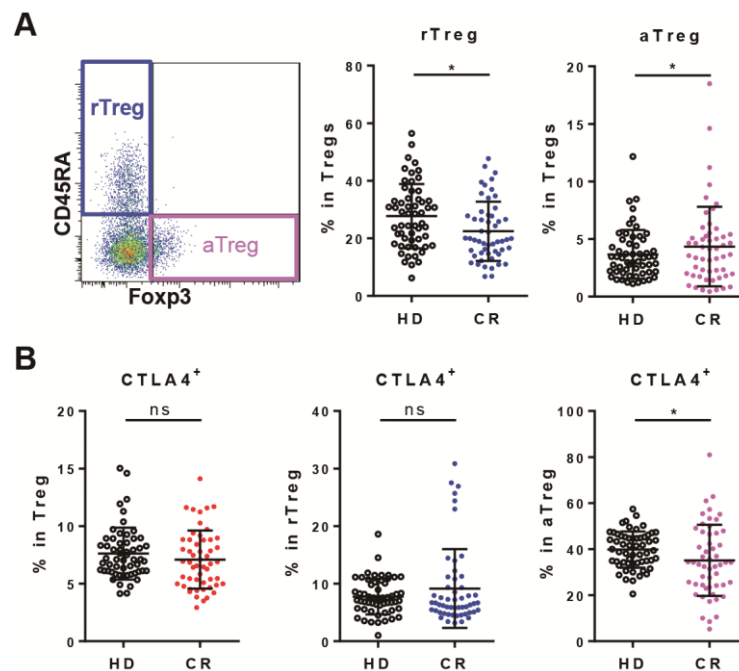

**Supplementary Figure S4. Frequencies and phenotype of Tregs and Treg subsets in peripheral blood of HD and CR.** A, Gating strategy and the frequencies of resting Treg (rTreg, CD45RA<sup>+</sup>Foxp3<sup>lo</sup>) and activated Treg (aTreg, CD45RA<sup>-</sup>Foxp3<sup>hi</sup>) in Treg. B, The frequencies of CTLA4<sup>+</sup> cells in Treg, rTreg and aTreg. ns, non-significant; \*, P<0.05.

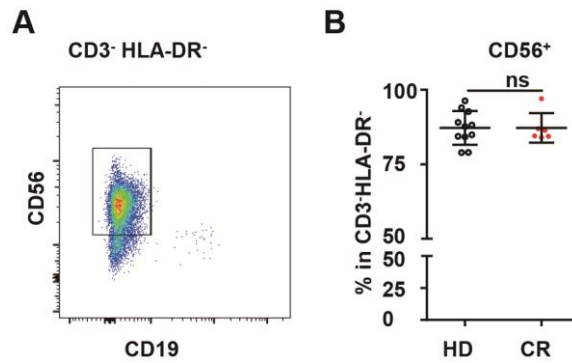

**Supplementary Figure S5. Frequencies of CD56<sup>+</sup> NK cells in CD3<sup>+</sup>HLA-DR<sup>-</sup> lymphocytes cells of peripheral blood.** Gating strategy and the frequencies of CD56<sup>+</sup> NK cells (CD56<sup>+</sup>CD19<sup>-</sup>) in CD3<sup>+</sup>HLA-DR<sup>-</sup> lymphocytes of PBMCs derived from HD (n=11) and CR (n=6). ns, non-significant.

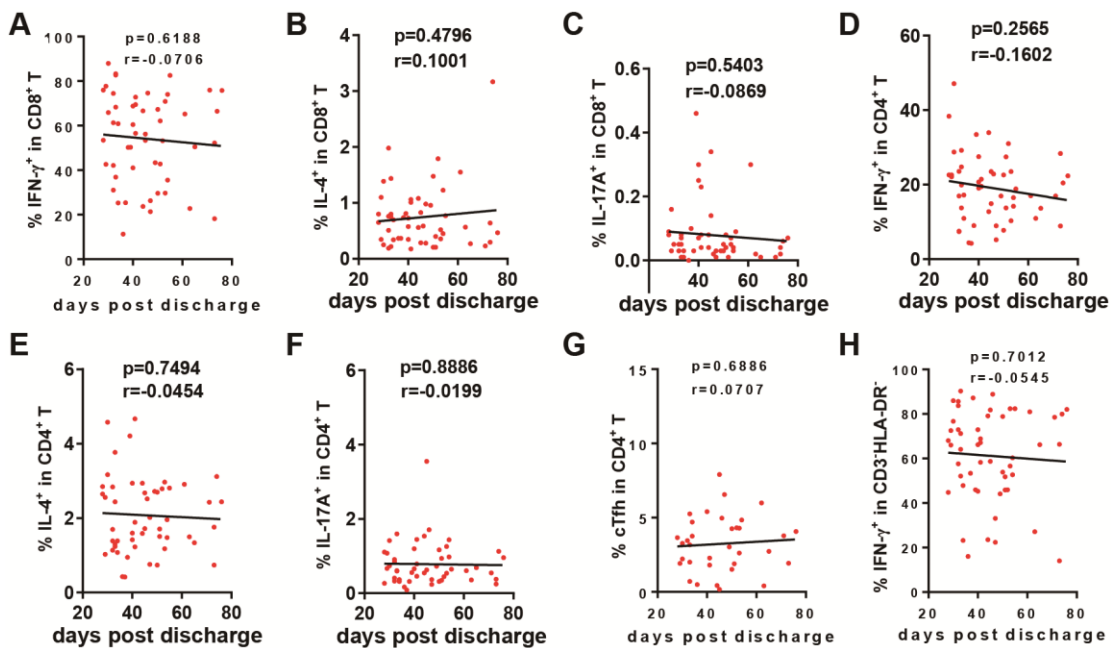

**Supplementary Figure S6. The correlation of lymphocytes response in CR cohort with days post discharge.** The correlation of days post discharge in CR with frequency of IFN- $\gamma$ <sup>+</sup> (A), IL-4<sup>+</sup> (B) and IL-17A<sup>+</sup> (C) in CD8<sup>+</sup> T cells were displayed in A-C. The correlation of days post discharge in CR with frequency of IFN- $\gamma$ <sup>+</sup> (D), IL-4<sup>+</sup> (E), IL-17A<sup>+</sup> (F) and cTfh (G) in CD4<sup>+</sup> T cells were displayed in D-G. The correlation of days post discharge in CR with frequency of IFN- $\gamma$ <sup>+</sup> in CD3<sup>+</sup>HLA-DR<sup>-</sup> lymphocytes were displayed in H.

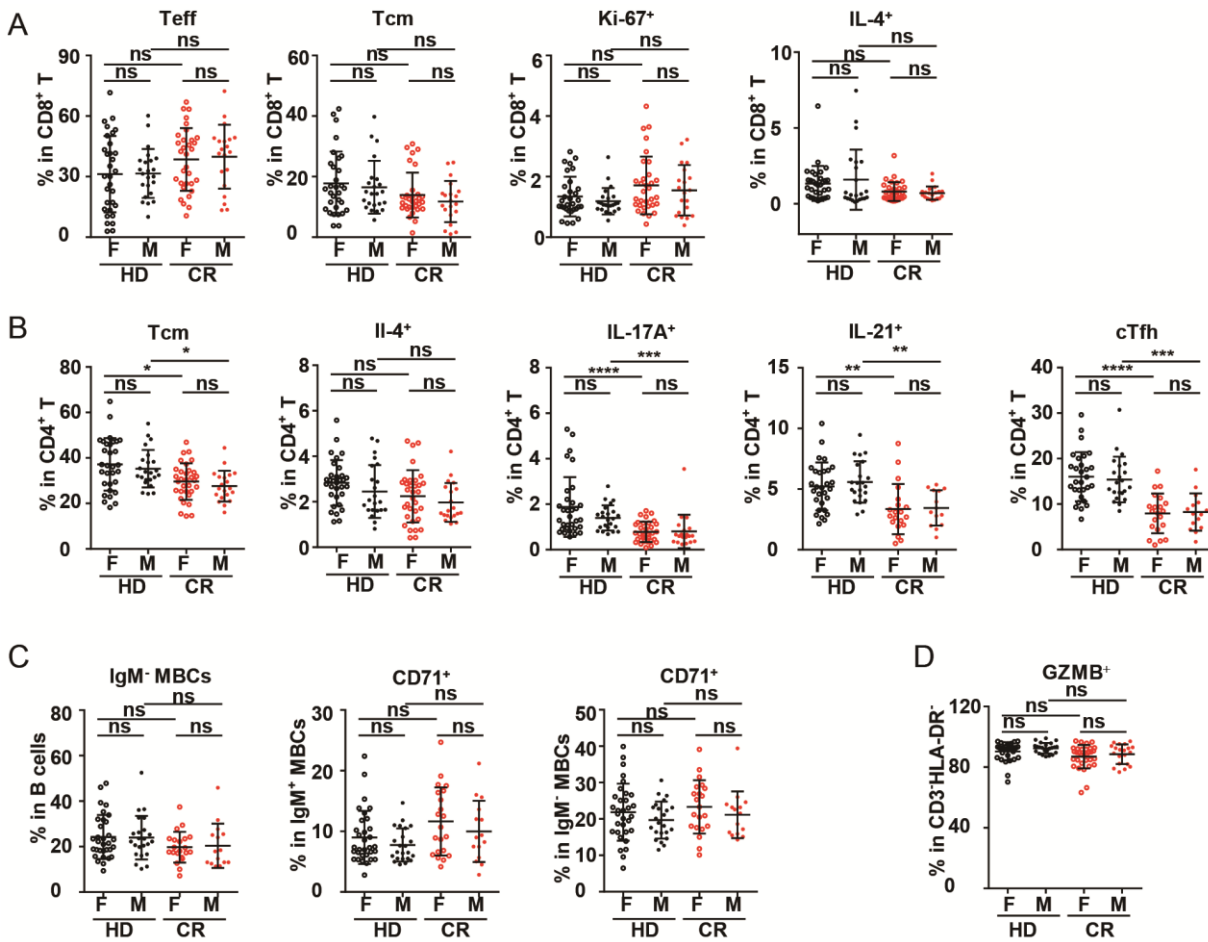

**Supplementary Figure S7. Sex-based differences in phenotypic alterations and potential dysfunction of lymphocytes in the CR cohort.** To elucidate the sex-based differences in lymphocyte changes in the CR cohort, the data from Figure 2 to Figure 5, which were significantly different between the HD and CR cohorts at the total cohort level, were reanalyzed. A, Frequencies of Teff, Tcm, Ki-67<sup>+</sup> and IL-4<sup>+</sup> CD8<sup>+</sup> T cells in PBMCs. B, Frequencies of Tcm, IL-4<sup>+</sup>, IL-17A<sup>+</sup>, IL-21<sup>+</sup> and cTfh cells in CD4<sup>+</sup> T cells in PBMCs. C, Frequency of IgM<sup>-</sup> MBCs in B cells, frequency of CD71<sup>+</sup> in IgM<sup>+</sup> MBCs and frequency of CD71<sup>+</sup> in IgM<sup>-</sup> MBCs. D, Frequencies of GZMB<sup>+</sup> in CD3<sup>+</sup>HLA-DR<sup>-</sup> lymphocytes.

## Supplementary tables

Supplementary Table S1 Clinical information of the CR cohort.

| Final code | Sex | Age | Disease duration | Day of discharge | Day of testing | Days post discharge | SARS-CoV-2 antibody |     | Blood oxygen saturation | Symptoms in two weeks |                |       |               | Blood routine examination (10 <sup>9</sup> /L) |      |             |             |
|------------|-----|-----|------------------|------------------|----------------|---------------------|---------------------|-----|-------------------------|-----------------------|----------------|-------|---------------|------------------------------------------------|------|-------------|-------------|
|            |     |     |                  |                  |                |                     | IgG                 | IgM |                         | Fever                 | Shod of breath | Cough | Expectoration | Oxygen uptake                                  | WBC  | Neutrophils | Lymphocytes |
| 1          | M   | 43  | 35               | 2020-3-17        | 2020-4-14      | 28                  | +                   | +   | 99                      | -                     | -              | -     | -             | -                                              | 6.22 | 3.81        | 1.95        |
| 2          | F   | 46  | 28               | 2020-2-5         | 2020-4-14      | 44                  | +                   | +   | 99                      | -                     | -              | +     | -             | -                                              | 6.52 | 1.59        | 1.8         |
| 3          | F   | 50  | 38               | 2020-3-13        | 2020-4-14      | 32                  | +                   | -   | 99                      | -                     | -              | -     | -             | -                                              | 5.54 | 3.66        | 1.33        |
| 4          | M   | 68  | 46               | 2020-3-12        | 2020-4-14      | 39                  | +                   | -   | 99                      | -                     | -              | -     | -             | -                                              | 5.68 | 3.47        | 1.91        |
| 5          | F   | 40  | 32               | 2020-3-1         | 2020-4-14      | 54                  | +                   | +   | 99                      | -                     | -              | -     | -             | -                                              | 5.21 | 3.88        | 1.03        |
| 6          | F   | 48  | 41               | 2020-3-2         | 2020-4-14      | 73                  | +                   | -   | 99                      | -                     | -              | -     | -             | -                                              | 6.06 | 2.71        | 2.94        |
| 7          | F   | 39  | 17               | 2020-3-2         | 2020-4-14      | 45                  | +                   | +   | 98                      | -                     | -              | -     | -             | -                                              | 6.26 | 4.12        | 1.64        |
| 8          | M   | 45  | 17               | 2020-3-13        | 2020-4-14      | 61                  | +                   | +   | 99                      | -                     | -              | -     | -             | -                                              | 5.06 | 2.64        | 1.81        |
| 9          | M   | 60  | 37               | 2020-2-28        | 2020-4-14      | 41                  | +                   | -   | 98                      | -                     | -              | -     | -             | -                                              | 3.75 | 2.12        | 1.26        |
| 10         | F   | 34  | 30               | 2020-3-6         | 2020-4-14      | 41                  | +                   | -   | 98                      | -                     | -              | -     | -             | -                                              | 5.55 | 3.06        | 1.88        |
| 11         | M   | 32  | 28               | 2020-2-20        | 2020-4-14      | 29                  | +                   | -   | 95                      | -                     | -              | -     | -             | -                                              | 6.56 | 4.12        | 2.07        |
| 12         | M   | 55  | 22               | 2020-1-31        | 2020-4-14      | 32                  | +                   | -   | 96                      | -                     | -              | -     | -             | -                                              | 5.33 | 1.9         | 3.01        |
| 13         | F   | 54  | 23               | 2020-2-1         | 2020-4-14      | 38                  | +                   | -   | 99                      | -                     | -              | -     | -             | -                                              | 4.78 | 2.85        | 1.48        |
| 14         | M   | 35  | 40               | 2020-3-5         | 2020-4-14      | 40                  | +                   | +   | 98                      | -                     | -              | -     | -             | -                                              | 6.9  | 3.44        | 2.95        |
| 15         | F   | 57  | 16               | 2020-2-29        | 2020-4-14      | 41                  | +                   | -   | 99                      | -                     | +              | -     | -             | -                                              | 5.69 | 3.15        | 2.01        |
| 16         | F   | 27  | 45               | 2020-3-10        | 2020-4-14      | 44                  | +                   | -   | 99                      | -                     | -              | -     | -             | -                                              | 5.29 | 2.7         | 2.2         |
| 17         | F   | 31  | 22               | 2020-2-13        | 2020-4-14      | 37                  | +                   | +   | 99                      | -                     | -              | -     | -             | -                                              | 6.36 | 3.18        | 2.32        |
| 18         | F   | 51  | 35               | 2020-3-14        | 2020-4-14      | 40                  | +                   | +   | 99                      | -                     | -              | -     | -             | -                                              | 3.95 | 2.22        | 1.41        |
| 19         | F   | 34  | 44               | 2020-3-12        | 2020-4-14      | 51                  | +                   | +   | 98                      | -                     | -              | -     | -             | -                                              | 7.22 | 4.46        | 2.21        |
| 20         | F   | 68  | 21               | 2020-2-14        | 2020-4-14      | 74                  | +                   | +   | 99                      | -                     | -              | -     | -             | -                                              | 4.08 | 3.22        | 0.64        |
| 21         | M   | 60  | 14               | 2020-3-15        | 2020-4-14      | 47                  | +                   | +   | 99                      | -                     | -              | -     | -             | -                                              | 6.31 | 3.76        | 2.01        |

|    |   |    |    |           |           |    |   |   |    |   |   |   |   |   |      |      |      |
|----|---|----|----|-----------|-----------|----|---|---|----|---|---|---|---|---|------|------|------|
| 22 | F | 31 | 54 | 2020-3-17 | 2020-4-14 | 55 | + | + | 98 | - | - | - | - | - | 7.24 | 3.45 | 3.12 |
| 23 | F | 39 | 16 | 2020-2-12 | 2020-4-14 | 73 | + | + | 96 | - | - | - | - | - | 6.09 | 3.56 | 2.06 |
| 24 | M | 37 | 22 | 2020-2-22 | 2020-4-15 | 33 | + | - | 99 | - | - | - | - | - | 6.96 | 4.78 | 1.76 |
| 25 | M | 70 | 18 | 2020-3-4  | 2020-4-15 | 34 | + | - | 98 | - | + | - | - | - | 7.13 | 4.38 | 2.08 |
| 26 | F | 51 | 45 | 2020-3-18 | 2020-4-15 | 44 | + | - | 99 | - | - | - | + | - | 7.98 | 5    | 2.44 |
| 27 | F | 40 | 27 | 2020-3-1  | 2020-4-15 | 46 | + | - | 99 | - | - | - | - | - | 5.17 | 3.13 | 1.66 |
| 28 | F | 51 | 25 | 2020-3-4  | 2020-4-15 | 41 | + | - | 99 | - | - | - | - | - | 3.82 | 1.92 | 1.42 |
| 29 | F | 61 | 28 | 2020-2-22 | 2020-4-15 | 36 | + | + | 98 | - | - | - | - | - | 6.85 | 3.74 | 2.39 |
| 30 | F | 67 | 44 | 2020-3-14 | 2020-4-15 | 32 | + | - | 98 | - | + | - | - | - | 7.32 | 3.68 | 2.9  |
| 31 | M | 56 | 34 | 2020-3-18 | 2020-4-15 | 34 | + | + | 99 | - | - | - | - | - | 7.96 | 4.81 | 2.5  |
| 32 | M | 51 | 42 | 2020-3-16 | 2020-4-15 | 63 | + | - | 98 | - | - | - | - | - | 8.58 | 6.74 | 1.38 |
| 33 | F | 61 | 14 | 2020-3-6  | 2020-4-15 | 28 | + | + | 98 | - | - | - | - | - | 6.13 | 3.43 | 2.15 |
| 34 | M | 31 | 43 | 2020-2-25 | 2020-4-15 | 53 | + | - | 98 | - | - | + | - | - | 6.38 | 4.06 | 2.01 |
| 35 | M | 53 | 28 | 2020-2-10 | 2020-4-15 | 40 | + | + | 99 | - | - | - | - | - | 5.19 | 2.86 | 2    |
| 36 | F | 38 | 19 | 2020-3-13 | 2020-4-15 | 50 | + | - | 99 | - | - | - | - | - | 5.02 | 2.78 | 1.87 |
| 37 | F | 40 | 39 | 2020-3-7  | 2020-4-15 | 65 | + | - | 99 | - | - | - | - | - | 5.49 | 2.8  | 2.33 |
| 38 | M | 54 | 34 | 2020-3-5  | 2020-4-15 | 51 | + | - | 96 | - | - | - | - | - | 5.15 | 2.79 | 1.9  |
| 39 | F | 56 | 34 | 2020-2-24 | 2020-4-15 | 33 | + | - | 98 | - | - | - | - | + | 6.11 | 3.43 | 1.97 |
| 40 | F | 38 | 40 | 2020-3-4  | 2020-4-15 | 49 | + | + | 99 | - | - | - | - | - | 4.88 | 2.38 | 2.07 |
| 41 | F | 43 | 29 | 2020-3-1  | 2020-4-15 | 52 | + | - | 99 | - | - | - | - | - | 8.86 | 5.14 | 3.09 |
| 42 | F | 57 | 24 | 2020-2-23 | 2020-4-16 | 71 | + | + | 99 | - | - | + | - | - | 6.02 | 3.67 | 1.94 |
| 43 | M | 34 | 43 | 2020-3-13 | 2020-4-16 | 45 | + | - | 99 | - | - | + | - | - | 3.97 | 2.06 | 1.6  |
| 44 | F | 61 | 27 | 2020-3-8  | 2020-4-16 | 76 | + | - | 99 | - | - | + | + | - | 4.98 | 3.24 | 1.4  |
| 45 | F | 57 | 60 | 2020-3-5  | 2020-4-16 | 62 | + | - | 99 | - | - | - | - | - | 6.63 | 4.71 | 1.45 |
| 46 | M | 55 | 31 | 2020-2-23 | 2020-4-16 | 32 | + | - | 96 | - | + | + | + | - | 7.17 | 5.34 | 1.37 |
| 47 | M | 51 | 31 | 2020-2-26 | 2020-4-16 | 30 | + | - | 99 | - | - | - | - | - | 4.56 | 2.46 | 1.54 |
| 48 | M | 38 | 48 | 2020-3-14 | 2020-4-16 | 54 | + | - | 99 | - | - | - | - | - | 6.1  | 3.8  | 1.82 |
| 49 | F | 51 | 18 | 2020-2-26 | 2020-4-16 | 46 | + | + | 99 | - | - | - | - | - | 4.88 | 2.82 | 1.54 |
| 50 | M | 56 | 59 | 2020-3-17 | 2020-4-16 | 33 | + | - | 96 | - | - | - | - | - | 5.24 | 2.17 | 2.63 |
| 51 | M | 61 | 16 | 2020-1-31 | 2020-4-16 | 29 | + | + | 99 | - | - | - | - | - | 3.93 | 1.83 | 1.75 |
| 52 | F | 39 | 33 | 2020-2-27 | 2020-4-16 | 53 | + | - | 99 | - | - | - | - | - | 5.32 | 4.94 | 3.61 |



|    |   |    |    |           |           |    |   |   |    |   |   |   |   |   |      |      |      |
|----|---|----|----|-----------|-----------|----|---|---|----|---|---|---|---|---|------|------|------|
| 53 | F | 52 | 54 | 2020-2-19 | 2020-4-16 | 50 | + | - | 99 | - | - | - | - | - | 6.66 | 3.67 | 2.56 |
| 54 | F | 70 | 13 | 2020-2-1  | 2020-4-16 | 33 | + | - | 99 | - | - | - | - | - | 5.57 | 3.18 | 1.9  |
| 55 | F | 65 | 15 | 2020-2-23 | 2020-4-16 | 30 | + | - | 99 | - | - | - | - | - | 5.46 | 2.94 | 2.1  |

+, positive; -, negative.

Cells filled in yellow color means the value was higher than normal range, while cells filled in blue color means the value was lower than normal range.

**Supplementary Table S2 Reagents for flow cytometry.**

| Panel                       | Antibodies (clone)                                               | Staining procedure | Source      | Identifier |
|-----------------------------|------------------------------------------------------------------|--------------------|-------------|------------|
| 1                           | Fixable Viability Dye eFluor™ 506                                | surface            | eBioscience | 65-0866-14 |
|                             | APC/Cyanine7 anti-human CD3 (HIT3a)                              | surface            | BioLegend   | 300318     |
|                             | Alexa Fluor® 700 anti-human CD4 (OKT4)                           | surface            | BioLegend   | 317426     |
|                             | Brilliant Violet 605™ anti-human CD8a (RPA-T8)                   | surface            | BioLegend   | 301040     |
|                             | FITC anti-human CD45RO (UCHL1)                                   | surface            | BioLegend   | 304242     |
|                             | Pacific Blue™ anti-human CD27 (O323)                             | surface            | BioLegend   | 302822     |
|                             | PerCP/Cyanine5.5 anti-human HLA-DR (L243)                        | surface            | BioLegend   | 307630     |
|                             | Brilliant Violet 650™ anti-human CD38 (HB-7)                     | surface            | BioLegend   | 356620     |
|                             | PE/Dazzle™ 594 anti-human CD279 (PD-1) (EH12.2H7)                | surface            | BioLegend   | 329940     |
|                             | PE-Cyanine7 anti human T-Bet (4B10)                              | intracellular      | eBioscience | 25-5825-82 |
| PE anti-human Ki-67 (Ki-67) | intracellular                                                    | BioLegend          | 350504      |            |
| 2                           | Fixable Viability Dye eFluor™ 506                                | surface            |             | 65-0866-14 |
|                             | Alexa Fluor® 700 anti-human CD3 (SK7)                            | surface            | BioLegend   | 344822     |
|                             | Brilliant Violet 650™ anti-human CD4 (RPA-T4)                    | surface            | BioLegend   | 300536     |
|                             | Brilliant Violet 605™ anti-human CD8a (RPA-T8)                   | surface            | BioLegend   | 301040     |
|                             | FITC anti-human CD25 (BC96)                                      | surface            | BioLegend   | 302604     |
|                             | PerCP/Cy5.5 anti-human CD127 (A019D5)                            | surface            | BioLegend   | 351322     |
|                             | PE/Cy7 anti-human CTLA4 (L3D10)                                  | surface            | BioLegend   | 349914     |
|                             | APC/Cyanine7 anti-human CD45RA (HI100)                           | surface            | BioLegend   | 304127     |
|                             | Brilliant Violet 421™ anti-human FoxP3 (206D)                    | intracellular      | BioLegend   | 320124     |
| 3                           | Fixable Viability Dye eFluor™ 506                                | surface            | eBioscience | 65-0866-14 |
|                             | Alexa Fluor® 700 anti-human CD3 (SK7)                            | surface            | BioLegend   | 344822     |
|                             | Brilliant Violet 605™ anti-human CD19 (HIB19)                    | surface            | BioLegend   | 302244     |
|                             | FITC anti-human CD20 (2H7)                                       | surface            | BioLegend   | 302304     |
|                             | PE/Cyanine7 anti-human CD27 (O323)                               | surface            | BioLegend   | 302838     |
|                             | Brilliant Violet 650™ anti-human CD38 (HB-7)                     | surface            | BioLegend   | 356620     |
|                             | PE/Dazzle™ 594 anti-human CD71 (CY1G4)                           | surface            | BioLegend   | 334120     |
|                             | PerCP/Cyanine5.5 anti-human HLA-DR (L243)                        | surface            | BioLegend   | 307630     |
|                             | APC anti-human CD275 (B7-H2, ICOSL) (2D3)                        | surface            | BioLegend   | 309408     |
|                             | PE anti-human IgM                                                | surface            | BioLegend   | 314508     |
| 4                           | Fixable Viability Dye eFluor™ 506                                | surface            | eBioscience | 65-0866-14 |
|                             | APC/Cyanine7 anti-human CD3 (HIT3a)                              | surface            | BioLegend   | 300318     |
|                             | Brilliant Violet 650™ anti-human CD4 (RPA-T4)                    | surface            | BioLegend   | 300536     |
|                             | Brilliant Violet 605™ anti-human CD8a (RPA-T8)                   | surface            | BioLegend   | 301040     |
|                             | PerCP/Cyanine5.5 anti-human CD185 (CXCR5) (J252D4)               | surface            | BioLegend   | 356910     |
|                             | PE/Dazzle™ 594 anti-human CD279 (PD-1) (EH12.2H7)                | surface            | BioLegend   | 329940     |
|                             | Brilliant Violet 421™ anti-human/mouse/rat CD278 (ICOS)(C398.4A) | surface            | BioLegend   | 313524     |

|   |                                                    |               |             |            |
|---|----------------------------------------------------|---------------|-------------|------------|
|   | APC anti-human CD196 (CCR6) (G034E3)               | surface       | BioLegend   | 353416     |
|   | Alexa Fluor® 700 anti-human CD183 (CXCR3) (G025H7) | surface       | BioLegend   | 353742     |
|   | PE/Cyanine7 anti-human Ki-67 (Ki-67)               | intracellular | BioLegend   | 350526     |
| 5 | Fixable Viability Dye eFluor™ 506                  | surface       | eBioscience | 65-0866-14 |
|   | APC/Cyanine7 anti-human CD3 (HIT3a)                | surface       | BioLegend   | 300318     |
|   | Alexa Fluor® 700 anti-human CD4 (OKT4)             | surface       | BioLegend   | 317426     |
|   | Brilliant Violet 605™ anti-human CD8a (RPA-T8)     | surface       | BioLegend   | 301040     |
|   | PE/Cy7 anti-human IL-4 (MP4-25D2 )                 | intracellular | BioLegend   | 500824     |
|   | PerCP/Cy5.5 anti-human IL-17A (BL168)              | intracellular | BioLegend   | 512314     |
|   | PE/Dazzle™ 594 anti-human IFN- $\gamma$ (B27)      | intracellular | BioLegend   | 506530     |
|   | Brilliant Violet 650™ anti-human IL-2 (MQ1-17H12)  | intracellular | BioLegend   | 500334     |
|   | PE anti-human IL-21 (3A3-N2)                       | intracellular | BioLegend   | 513004     |
|   | FITC anti-human/mouse Granzyme B (QA16A02)         | intracellular | BioLegend   | 372206     |
